# Supplementary material
Source: publisher figshare collection journal article supplement (https://asha.figshare.com/articles/dataset/_/21991931)
Supplement: Supplementary file 1 [file 1]

**Supplemental Material S6.** Partial correlations controlling for pretreatment Recalling Sentences.

| Variable               | Posttreatment<br>RS | Fluid<br>reasoning | Age  | Female | Proc<br>Speed | Sustained<br>Attention | Working<br>Memory | L1<br>Grammaticality |
|------------------------|---------------------|--------------------|------|--------|---------------|------------------------|-------------------|----------------------|
| Fluid<br>Reasoning     | .16                 |                    |      |        |               |                        |                   |                      |
| Age                    | .18                 | .14                |      |        |               |                        |                   |                      |
| Female                 | .06                 | -.24               | .18  |        |               |                        |                   |                      |
| Proc Speed             | .20                 | -.15               | -.13 | .04    |               |                        |                   |                      |
| Sustained<br>Attention | -.11                | .08                | .14  | -.08   | -.21          |                        |                   |                      |
| Working<br>Memory      | -.15                | .11                | -.33 | -.33   | -.08          | .31                    |                   |                      |
| L1<br>Grammaticality   | .13                 | .18                | -.21 | -.01   | .25           | -.11                   | .13               |                      |
| L2<br>Grammaticality   | .45*                | .19                | .19  | .33    | .13           | .04                    | -.18              | -.09                 |

*Note.*  $df = 29$ . RS = Recalling Sentences, CELF-4 English.

\* $p < .05$ .
