# Supplementary material
Source: publisher figshare collection journal article supplement (https://asha.figshare.com/articles/dataset/_/21991931)
Supplement: Supplementary file 2 [file 1]

**Supplemental Material S3.** Partial correlations controlling for pretreatment Recordando Oraciones.

| Variable               | Posttreatment<br>RO | Fluid<br>reasoning | Age     | Female | Processing<br>Speed | Sustained<br>Attention | Working<br>Memory | L1<br>Grammaticality |
|------------------------|---------------------|--------------------|---------|--------|---------------------|------------------------|-------------------|----------------------|
| Fluid reasoning        | .13                 |                    |         |        |                     |                        |                   |                      |
| Age                    | .17                 | .60***             |         |        |                     |                        |                   |                      |
| Female                 | .20                 | -.15               | .16     |        |                     |                        |                   |                      |
| Processing<br>Speed    | -.41**              | -.48**             | -.59*** | -.08   |                     |                        |                   |                      |
| Sustained<br>Attention | -.08                | .24                | .31     | -.05   | -.34                |                        |                   |                      |
| Working<br>Memory      | .16                 | .31                | .20     | -.29   | -.31                | .39*                   |                   |                      |
| L1<br>Grammaticality   | .32                 | .09                | -.19    | -.12   | .15                 | -.13                   | .07               |                      |
| L2<br>Grammaticality   | .15                 | .52**              | .65***  | .34    | -.28                | .22                    | .13               | -.06                 |

*Note.*  $df = 29$ . RO = Recordando Oraciones, CELF-4 Spanish.

\* $p < .05$ . \*\* $p < .01$ . \*\*\* $p < .001$ .
