# Supplementary material
Source: publisher figshare collection journal article supplement (https://asha.figshare.com/articles/dataset/_/21991931)
Supplement: Supplementary file 3 [file 1]

**Supplemental Material S2.** Partial correlations controlling for pretreatment Conceptos y Sigiuiendo Direcciones.

| Variable               | Posttreatment<br>CSD | Fluid<br>reasoning | Age    | Female | Processing<br>Speed | Sustained<br>Attention | Working<br>Memory | L1<br>Grammaticality |
|------------------------|----------------------|--------------------|--------|--------|---------------------|------------------------|-------------------|----------------------|
| Fluid reasoning        | .20                  |                    |        |        |                     |                        |                   |                      |
| Age                    | .29                  | .42*               |        |        |                     |                        |                   |                      |
| Female                 | .39*                 | -.11               | .27    |        |                     |                        |                   |                      |
| Processing<br>Speed    | -.26                 | -.27               | -.39*  | -.06   |                     |                        |                   |                      |
| Sustained<br>Attention | .24                  | .27                | .36    | -.03   | -.34                |                        |                   |                      |
| Working<br>Memory      | .23                  | .17                | .04    | -.25   | -.16                | .40*                   |                   |                      |
| L1<br>Grammaticality   | .24                  | .09                | -.18   | .00    | .28                 | -.09                   | .09               |                      |
| L2<br>Grammaticality   | .46*                 | .47**              | .63*** | .36    | -.18                | .21                    | .05               | -.07                 |

*Note.*  $df = 29$ . CSD = Conceptos y Sigiuiendo Direcciones, CELF-4 Spanish.

\* $p < .05$ . \*\* $p < .01$ . \*\*\* $p < .001$ .
