# Supplementary material
Source: publisher figshare collection journal article supplement (https://asha.figshare.com/articles/dataset/_/21991931)
Supplement: Supplementary file 4 [file 1]

**Supplemental Material S1.** Bivariate correlations among all variables.

| Variable   | Age    | Sex  | Fluid Reas | Pre CSD | Post CSD | Pre RO | Post RO | Pre FO | Post FO | Pre CD | Post CD | Pre RS | Post RS | Pre FS | Post FS | PS   | SSA  | WM  | L1 Gr |
|------------|--------|------|------------|---------|----------|--------|---------|--------|---------|--------|---------|--------|---------|--------|---------|------|------|-----|-------|
| Sex        | .22    |      |            |         |          |        |         |        |         |        |         |        |         |        |         |      |      |     |       |
| Fluid Reas | .62*** | -.09 |            |         |          |        |         |        |         |        |         |        |         |        |         |      |      |     |       |
| Pre CSD    | .59*** | .00  | .58**      |         |          |        |         |        |         |        |         |        |         |        |         |      |      |     |       |
| Post CSD   | .57**  | .29  | .51**      | .67***  |          |        |         |        |         |        |         |        |         |        |         |      |      |     |       |
| Pre RO     | .27    | .24  | .21        | .50**   | .44*     |        |         |        |         |        |         |        |         |        |         |      |      |     |       |
| Post RO    | .31    | .30  | .24        | .62***  | .55**    | .93*** |         |        |         |        |         |        |         |        |         |      |      |     |       |
| Pre FO     | .45**  | .14  | .36*       | .59***  | .60***   | .79*** | .80***  |        |         |        |         |        |         |        |         |      |      |     |       |
| Post FO    | .61*** | .13  | .53**      | .67***  | .62***   | .68*** | .74***  | .83*** |         |        |         |        |         |        |         |      |      |     |       |
| Pre CD     | .88*** | .21  | .75***     | .66***  | .72***   | .40*   | .45**   | .55**  | .71***  |        |         |        |         |        |         |      |      |     |       |
| Post CD    | .84*** | .14  | .68***     | .70***  | .72***   | .42*   | .46**   | .64*** | .77***  | .91*** |         |        |         |        |         |      |      |     |       |
| Pre RS     | .90*** | .15  | .64**      | .68***  | .64***   | .43*   | .50**   | .54**  | .67***  | .87*** | .87***  |        |         |        |         |      |      |     |       |
| Post RS    | .86*** | .17  | .64***     | .67***  | .63***   | .44*   | .50**   | .64*** | .67***  | .84*** | .84***  | .92**  |         |        |         |      |      |     |       |
| Pre FS     | .87*** | .30  | .66***     | .72***  | .69***   | .56**  | .62***  | .69*** | .75***  | .90*** | .89***  | .90*** | .90***  |        |         |      |      |     |       |
| Post FS    | .82*** | .24  | .66***     | .66***  | .71***   | .51**  | .55***  | .73*** | .75***  | .87*** | .886*   | .83*** | .87***  | .95*** |         |      |      |     |       |
| PS         | -.54** | -.05 | -.45*      | -.43*   | -.46**   | .10    | -.06    | -.08   | -.21    | -.47** | -.55**  | -.55** | -.44*   | -.46** | -.41*   |      |      |     |       |
| SSA        | .32    | -.03 | .25        | .05     | .22      | .08    | .04     | .19    | .11     | .21    | .28     | .30    | .23     | .26    | .31     | -.33 |      |     |       |
| WM         | .24    | -.23 | .34        | .36*    | .40*     | .17    | .22     | .18    | .14     | .29    | .29     | .411*  | .32     | .29    | .26     | -.29 | .39* |     |       |
| L1 Gr      | -.04   | .00  | .17        | .17     | .29      | .46**  | .53**   | .52**  | .48**   | .18    | .13     | .06    | .11     | .20    | .26     | .18  | -.08 | .14 |       |
| L2 Gr      | .64*** | .35  | .52**      | .26     | .50**    | .07    | .12     | .30    | .41*    | .66*** | .60***  | .64*** | .73***  | .62*** | .67***  | -.27 | .22  | .14 | -.03  |

*Note.*  $df = 32$ . Female is the reference group for sex. Fluid reasoning was measured using the Test of Nonverbal Intelligence, 3<sup>rd</sup> edition (TONI-3, Brown et al., 1997). Pre- and post-treatment language scores measured using the CELF = Clinical Evaluation of Language Fundamentals, 4th edition, in English (Semel et al., 2003) and Spanish (Wiig et al., 2006). Raw scores from TONI-3 and CELF were used in analyses. Fluid reas = fluid reasoning; Pre- = pretreatment; post = posttreatment; CSD = Conceptos & Siguiendo Direcciones from CELF-4 Spanish; RO = Recordando Oraciones from CELF-4 Spanish; FO = Formulación de Oraciones from CELF-4 Spanish; CD = Concepts & Following Directions from CELF-4 English; RS = Recalling Sentences from CELF-4 English; FS = Formulated Sentences from CELF-4 English; PS = processing speed; SSA = sustained selective attention; WM = working memory; L1 Gr = Grammaticality in L1 (Spanish); L2 Gr = Grammaticality in L2 (English).  
 $*p < .05$ .  $**p < .01$ .  $***p < .001$ .
