# Supplementary material
Source: publisher figshare collection journal article supplement (https://asha.figshare.com/articles/dataset/_/21991931)
Supplement: Supplementary file 5 [file 1]

**Supplemental Material S7.** Partial correlations controlling for pretreatment Formulated Sentences.

| Variable               | Posttreatment<br>FS | Fluid<br>Reasoning | Age   | Female | Proc<br>Speed | Sustained<br>Attention | Working<br>Memory | L1<br>Grammaticality |
|------------------------|---------------------|--------------------|-------|--------|---------------|------------------------|-------------------|----------------------|
| Fluid<br>Reasoning     | .16                 |                    |       |        |               |                        |                   |                      |
| Age                    | -.07                | .12                |       |        |               |                        |                   |                      |
| Female                 | -.16                | -.40*              | -.09  |        |               |                        |                   |                      |
| Proc Speed             | .11                 | -.22               | -.32  | .10    |               |                        |                   |                      |
| Sustained<br>Attention | .22                 | .10                | .20   | -.12   | -.24          |                        |                   |                      |
| Working<br>Memory      | -.06                | .20                | -.04  | -.35   | -.18          | .34                    |                   |                      |
| L1<br>Grammaticality   | .24                 | .06                | -.44* | -.058  | .31           | -.14                   | .09               |                      |
| L2<br>Grammaticality   | .33                 | .19                | .26   | .22    | .02           | .08                    | -.06              | -.19                 |

*Note.*  $df = 29$ . FS = Formulated Sentences, CELF-4 English.

\* $p < .05$ .
