# Supplementary material
Source: publisher figshare collection journal article supplement (https://asha.figshare.com/articles/dataset/_/21991931)
Supplement: Supplementary file 6 [file 1]

**Supplemental Material S5.** Partial correlations controlling for pretreatment Concepts & Following Directions.

| Variable               | Posttreatment<br>CFD | Fluid<br>reasoning | Age   | Female | Proc<br>Speed | Sustained<br>Attention | Working<br>Memory | L1<br>Grammaticality |
|------------------------|----------------------|--------------------|-------|--------|---------------|------------------------|-------------------|----------------------|
| Fluid reasoning        | -.03                 |                    |       |        |               |                        |                   |                      |
| Age                    | .21                  | -.13               |       |        |               |                        |                   |                      |
| Female                 | -.13                 | -.38*              | .08   |        |               |                        |                   |                      |
| Proc Speed             | -.34                 | -.16               | -.30  | .05    |               |                        |                   |                      |
| Sustained<br>Attention | .22                  | .14                | .30   | -.08   | -.27          |                        |                   |                      |
| Working<br>Memory      | .07                  | .19                | -.04  | -.31   | -.18          | .36                    |                   |                      |
| L1<br>Grammaticality   | -.08                 | .07                | -.41* | -.03   | .30           | -.12                   | .10               |                      |
| L2<br>Grammaticality   | .02                  | .05                | .18   | .29    | .06           | .11                    | -.07              | -.19                 |

*Note.*  $df = 29$ . CFD = Concepts & Following Directions, CELF-4 English.

\* $p < .05$ .
