# Supplementary material
Source: publisher figshare collection journal article supplement (https://asha.figshare.com/articles/dataset/_/21991931)
Supplement: Supplementary file 7 [file 1]

**Supplemental Material S4.** Partial correlations controlling for pretreatment Formulacion de Oraciones.

| Variable               | Posttreatment<br>FO | Fluid<br>reasoning | Age    | Female | Proc<br>Speed | Sustained<br>Attention | Working<br>Memory | L1<br>Grammaticality |
|------------------------|---------------------|--------------------|--------|--------|---------------|------------------------|-------------------|----------------------|
| Fluid reasoning        | .45                 |                    |        |        |               |                        |                   |                      |
| Age                    | .46**               | .55                |        |        |               |                        |                   |                      |
| Female                 | .02                 | -.15               | .17    |        |               |                        |                   |                      |
| Proc Speed             | -.25                | -.45*              | -.57** | -.04   |               |                        |                   |                      |
| Sustained<br>Attention | -.08                | .20                | .27    | -.06   | -.32          |                        |                   |                      |
| Working<br>Memory      | .00                 | .30                | .18    | -.27   | -.28          | .37*                   |                   |                      |
| L1<br>Grammaticality   | .09                 | -.02               | -.37*  | -.08   | .26           | -.22                   | .06               |                      |
| L2<br>Grammaticality   | .30                 | .46*               | .59**  | .32    | -.26          | .17                    | .09               | -.23                 |

*Note.*  $df = 29$ . FO = Formulacion de Oraciones, CELF-4 Spanish.

\*  $p < .05$ . \*\*  $p < .01$ .
